# Supplementary material for: Free-standing composite hydrogel films for superior volumetric capacitance
Source: Royal Society of Chemistry journal article supplement (doi:10.1039/c5ta03113c), 2015-01-01
Supplement: c5ta03113c1.pdf [file c5ta03113c1.pdf]

## Supporting Information

### Free-Standing Composite Hydrogel Film for Superior Volumetric Capacitance

Mahmoud Moussa<sup>a,b</sup>, Zhiheng. Zhao<sup>a</sup>, Maher F. El-Kady<sup>c,d</sup>, Huakun Liu<sup>e</sup>, Andrew Michelmore<sup>a</sup>,  
Nobuyuki Kawashima<sup>a</sup>, Peter Majewski<sup>a</sup>, Jun Ma<sup>a\*</sup>

<sup>a</sup>Mawson Institute and School of Engineering, University of South Australia, Mawson Lakes, SA5095, Australia,

<sup>b</sup>Department of Chemistry, Faculty of Science, Beni-Suef University, Beni-Suef 62111, Egypt,

<sup>c</sup>Department of Chemistry & Biochemistry California, University of California, Los Angeles, CA 90095, USA.

<sup>d</sup>Department of Chemistry, Faculty of Science, Cairo University, Giza 12613, Egypt,

<sup>e</sup>Institute for Superconducting and Electronic Materials, University of Wollongong, Australia

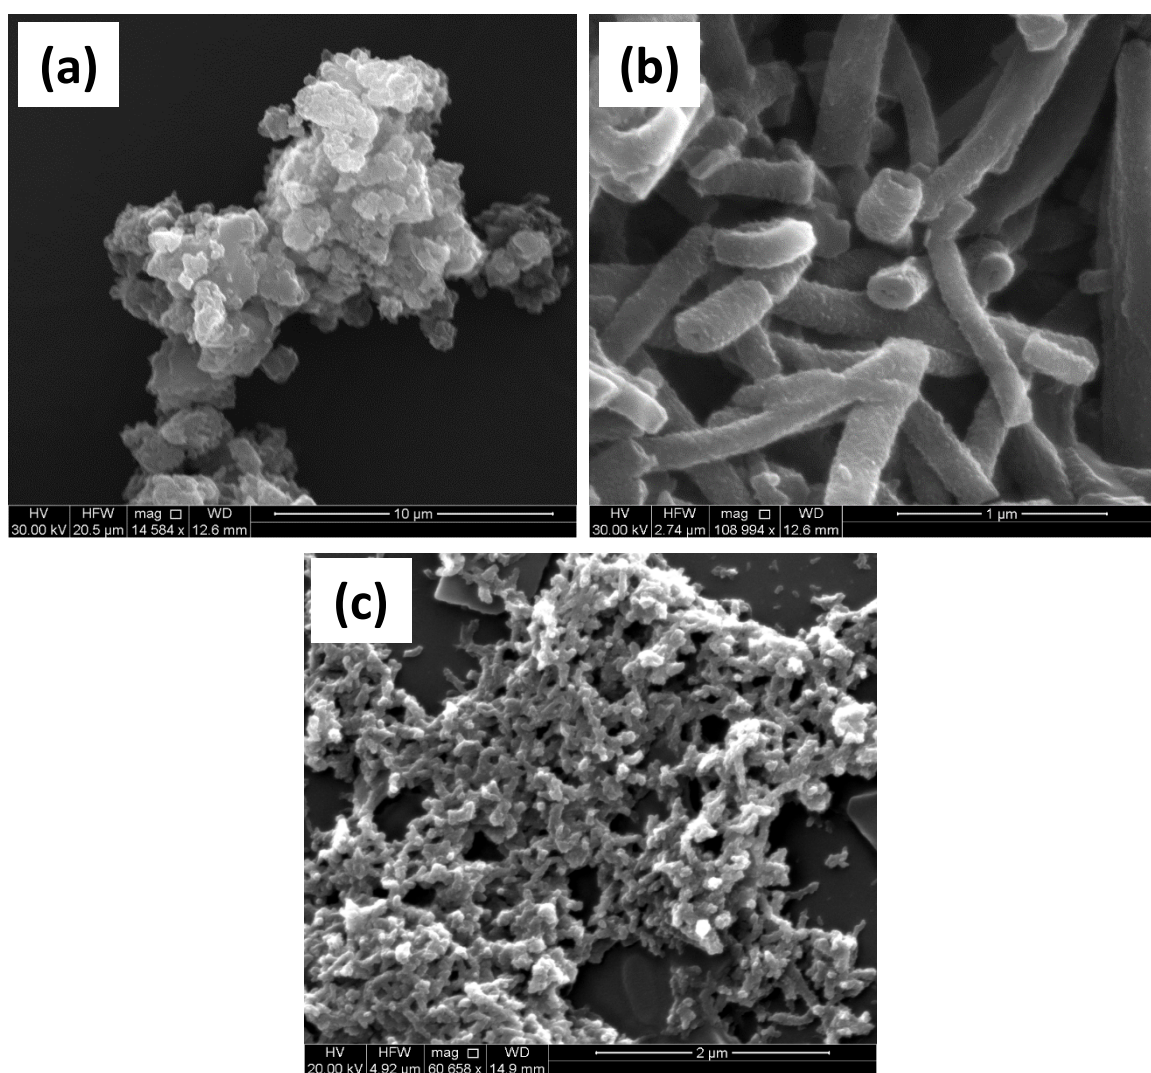

**Fig. S1.** SEM images of (a) a composite of polyaniline and poly(2-acrylamido-2-methyl-1-propanesulfonic acid) (denoted PANi-PAMPA), (b) PANi-nanotubes and (c) PANi-nanofibers.

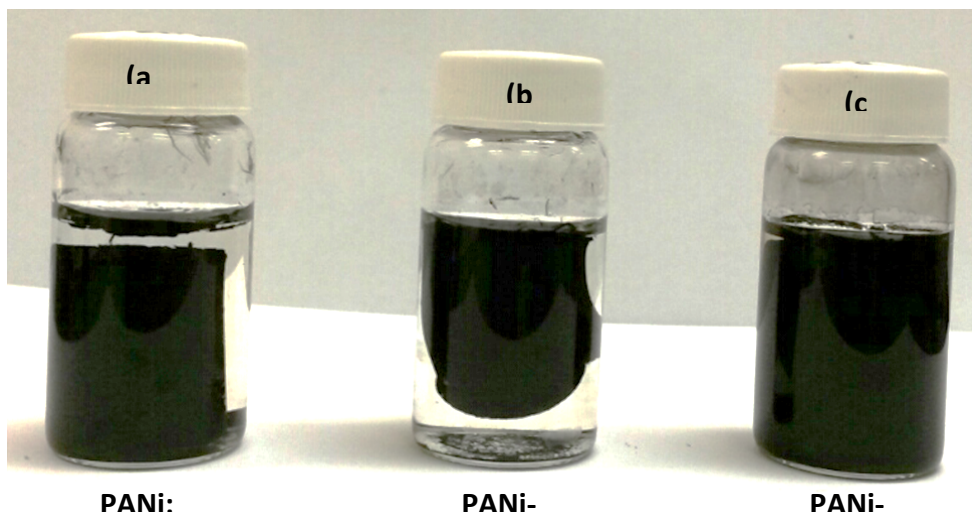

**Figure S2.** Photos of polyaniline/graphene hydrogel (PANi/ graphene hydrogel) in presence of (a) PANi- PAMPA, (b) PANi- nanotubes and (c) PANi-nanofibers.

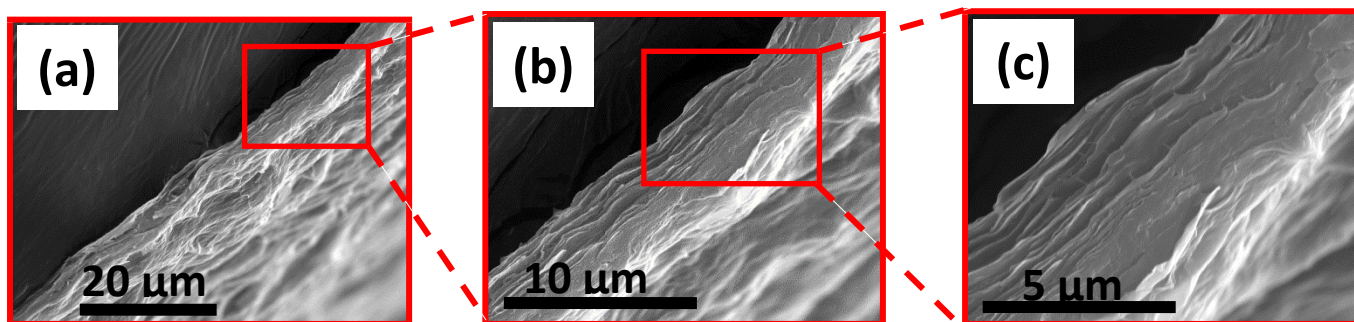

**Figure S3.** SEM of free-standing PANi/graphene hydrogel film illustrates its layer structure at different magnifications.

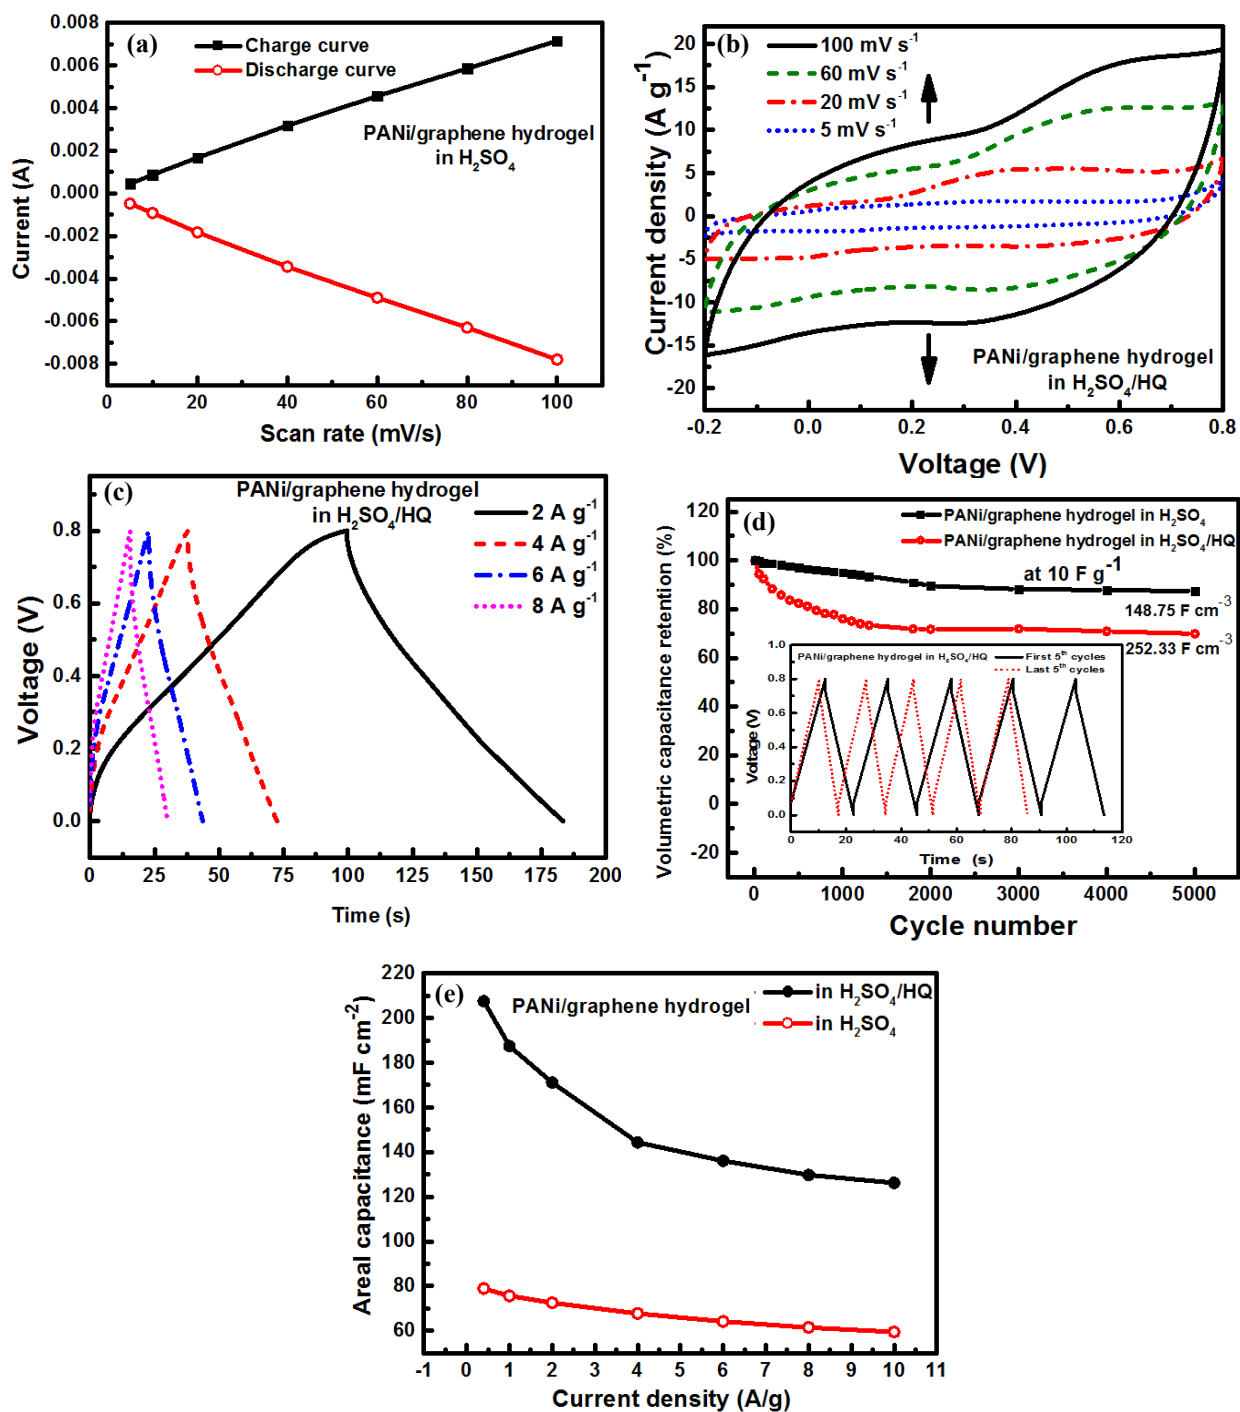

**Figure S4.** Electrochemical performance of PANi/graphene hydrogel electrodes in H<sub>2</sub>SO<sub>4</sub>/HQ: (b) correlation between current and scan rate in H<sub>2</sub>SO<sub>4</sub>, (a) Cyclic voltammograms (CVs) at different scan rates in H<sub>2</sub>SO<sub>4</sub>/HQ, (b) The charge/discharge curves (CDs) at different current densities in H<sub>2</sub>SO<sub>4</sub>/HQ, (c) cycling performance in H<sub>2</sub>SO<sub>4</sub>/HQ, and (e) the areal capacitances at different current densities.

**Table S1.** Reported gravimetric and volumetric capacitances of some graphene materials.

| Materials                             | Electrolyte                                    | $\rho$ (g/cm <sup>3</sup> ) | Electrode configuration | $C_{wt}$ (F/g)      | $C_{vol}$ (F/cm <sup>3</sup> )       | Ref.      |
|---------------------------------------|------------------------------------------------|-----------------------------|-------------------------|---------------------|--------------------------------------|-----------|
| PANi/graphene hydrogel                | 1 M H <sub>2</sub> SO <sub>4</sub>             | 1.02                        | Two                     | 223.82              | 228.30                               | This work |
| PANi/graphene hydrogel                | (1 M H <sub>2</sub> SO <sub>4</sub> /0.4 M HQ) | 1.02                        | Two                     | 580.52<br>(0.4 A/g) | 592.96<br>(0.4 A/g)                  | This work |
| High density porous graphene          | 6 M KOH                                        | 1.58                        | Two                     | 238.00              | 376.00                               | [2]       |
| Carbon nanotubes-graphene fibres      | PVA/H <sub>3</sub> PO <sub>4</sub>             | 0.59                        | Two                     | -                   | 300.00<br>(26.7 mA/cm <sup>3</sup> ) | [3]       |
| Compact reduced graphene gel          | 1 M H <sub>2</sub> SO <sub>4</sub>             | 1.25                        | Two                     | 191.70<br>(0.1 A/g) | 255.5<br>(0.1 A/g)                   | [1]       |
| Holey graphene frameworks             | 1 M H <sub>2</sub> SO <sub>4</sub>             | 0.71                        | Two                     | 310.00<br>(1 A/g)   | 220.10*<br>(1 A/g)                   | [4]       |
| Porous carbon layer/graphene          | 6 M KOH                                        | -                           | Three                   | 481.00<br>(0.5 A/g) | 212.00<br>(0.5 A/g)                  | [5]       |
| Graphene hydrogel                     | 1 M H <sub>2</sub> SO <sub>4</sub>             | 0.05                        | Three                   | 258.00<br>(0.3 A/g) | 12.9*<br>(0.3 A/g)                   | [6]       |
| Oriented graphene hydrogel            | 1 M H <sub>2</sub> SO <sub>4</sub>             | 0.069                       | Two                     | 215.00<br>(0.1 A/g) | 14.8*<br>(0.1 A/g)                   | [7]       |
| Graphene hydrogel film                | 1 M H <sub>2</sub> SO <sub>4</sub>             | 0.167                       | Two                     | 190.00<br>(1 A/g)   | 31.67*<br>(1 A/g)                    | [8]       |
| Functionalized graphene hydrogel film | 1 M H <sub>2</sub> SO <sub>4</sub>             | -                           | Two                     | 441.00<br>(1 A/g)   | -                                    | [9]       |
| Self-assembled graphene hydrogel      | 5 M KOH                                        | -                           | Two                     | 160.00<br>(1 A/g)   | -                                    | [10]      |

\* The volumetric capacitance ( $C_{vol}$ ) = gravimetric capacitance ( $C_{wt}$ )  $\times$  Packing density ( $\rho$ ) [1].

## References

- [1] X. Yang, C. Cheng, Y. Wang, L. Qiu, D. Li, *Science* 2013, 341, 534.
- [2] Y. Tao, X. Xie, W. Lv, D.-M. Tang, D. Kong, Z. Huang, H. Nishihara, T. Ishii, B. Li, D. Golberg, F. Kang, T. Kyotani, Q.-H. Yang, *Sci. Rep.* 2013, 3.
- [3] D. Yu, K. Goh, H. Wang, L. Wei, W. Jiang, Q. Zhang, L. Dai, Y. Chen, *Nat Nano* 2014, 9, 555.
- [4] Y. Xu, Z. Lin, X. Zhong, X. Huang, N. O. Weiss, Y. Huang, X. Duan, *Nat Commun* 2014, 5.
- [5] J. Yan, Q. Wang, C. Lin, T. Wei, Z. Fan, *Advanced Energy Materials* 2014, 4, n/a.
- [6] Q. Wu, Y. Sun, H. Bai, G. Shi, *Physical Chemistry Chemical Physics* 2011, 13, 11193.
- [7] X. Yang, J. Zhu, L. Qiu, D. Li, *Advanced Materials* 2011, 23, 2833.
- [8] Y. Xu, Z. Lin, X. Huang, Y. Liu, Y. Huang, X. Duan, *ACS Nano* 2013, 7, 4042.
- [9] Y. Xu, Z. Lin, X. Huang, Y. Wang, Y. Huang, X. Duan, *Advanced Materials* 2013, 25, 5779.
- [10] Y. Xu, K. Sheng, C. Li, G. Shi, *ACS Nano* 2010, 4, 4324.
